# Supplementary material for: Antifungal Potential of Canarian Plant Extracts against High-Risk Phytopathogens
Source: MDPI journal article supplement (doi:10.3390/plants11212988), 2022-11-05
Supplement: s1 [file s1]

## Supporting Information

# Antifungal Potential of Canarian Plant Extracts against High-risk Phytopathogens in Crops

Carolina P. Reyes<sup>1</sup>, Samuel Rodríguez Sabina <sup>2</sup>, Rocío López-Cabeza<sup>1</sup>, Cristina G. Montelongo<sup>2</sup>, Cristina Giménez<sup>2</sup>, Ignacio A. Jiménez<sup>1</sup>, Raimundo Cabrera<sup>2</sup> and Isabel L. Bazzochi<sup>1,\*</sup>

<sup>1</sup> Instituto Universitario de Bio-Organica Antonio González, Departamento de Química Orgánica, Universidad de La Laguna, Avenida Astrofísico Francisco Sánchez 2, 38206 La Laguna, Tenerife, Spain.

<sup>2</sup> Departamento de Botánica, Ecología y Fisiología Vegetal, Facultad de Ciencias, Sección Biología, Universidad de La Laguna, Avenida Astrofísico Francisco Sánchez, 38206 La Laguna, Tenerife, Spain.

\* Correspondence: ilopez@ull.edu.es (I.L.B); Tel.: +34922318594

### Table of Contents

**Table S1.** Antifungal effects (% growth inhibition) of plant extracts against *Alternaria alternata*, *Botrytis cinerea* and *Fusarium oxysporum*.

**Table S2.** Antifungal effects (% growth inhibition) of selected plant fractions against *Alternaria alternata*, *Botrytis cinerea* and *Fusarium oxysporum*.

**Figure S1.** *In vitro* test-assay of plant extracts against *Alternaria alternata*, *Botrytis cinerea* and *Fusarium oxysporum*.

**Table S1.** Antifungal effects (% growth inhibition) of plant extracts against *Alternaria alternata*, *Botrytis cinerea* and *Fusarium oxysporum*.

| Plant extract             | <i>A. alternata</i> |              |              | <i>B. cinerea</i> |               |              | <i>F. oxysporum</i> |              |              |
|---------------------------|---------------------|--------------|--------------|-------------------|---------------|--------------|---------------------|--------------|--------------|
|                           | 1 mg/mL             | 0.5 mg/mL    | 0.1 mg/mL    | 1 mg/mL           | 0.5 mg/mL     | 0.1 mg/mL    | 1 mg/mL             | 0.5 mg/mL    | 0.1 mg/mL    |
| <i>C. fusca</i>           | NA                  | ND           | ND           | 28.91 ± 8.49      | 24.89 ± 6.71  | 18.94 ± 6.27 | NA                  | ND           | ND           |
| <i>A. broussonetii</i>    | NA                  | ND           | ND           | NA                | ND            | ND           | NA                  | ND           | ND           |
| <i>A. thuscula</i>        | 23.63 ± 1.48        | 21.61 ± 5.32 | 13.34 ± 3.47 | 12.41 ± 0.55      | ND            | ND           | 41.21 ± 1.95        | 32.33 ± 4.10 | 19.29 ± 2.92 |
| <i>G. cassinoides</i>     | NA                  | ND           | ND           | NA                | ND            | ND           | NA                  | ND           | ND           |
| <i>C. symphytifolius</i>  | 38.10 ± 10.85       | 18.96 ± 3.73 | ND           | 39.08 ± 3.70      | 37.98 ± 4.72  | 19.57 ± 3.32 | 35.27 ± 4.92        | NA           | ND           |
| <i>S. canariensis</i>     | 47.60 ± 0.70        | 44.61 ± 1.30 | 27.36 ± 2.54 | 62.16 ± 4.36      | 56.23 ± 3.90  | 35.13 ± 7.83 | 47.95 ± 1.82        | 44.76 ± 1.17 | 33.21 ± 1.93 |
| <i>A. barbuja</i>         | NA                  | ND           | ND           | NA                | ND            | ND           | NA                  | ND           | ND           |
| <i>L. novocanariensis</i> | NA                  | ND           | ND           | NA                | ND            | ND           | 16.60 ± 3.57        | ND           | ND           |
| <i>L. canariensis</i>     | NA                  | ND           | ND           | NA                | ND            | ND           | NA                  | ND           | ND           |
| <i>R. pinnata</i>         | NA                  | ND           | ND           | 28.27 ± 7.49      | NA            | ND           | 25.47 ± 4.38        | NA           | ND           |
| <i>R. chalepensis</i>     | 17.08 ± 3.81        | ND           | ND           | NA                | ND            | ND           | 44.09 ± 1.63        | NA           | ND           |
| <i>D. innoxia</i>         | 37.95 ± 2.40        | 35.14 ± 4.34 | 25.75 ± 4.40 | 52.11 ± 5.22      | 30.48 ± 5.19  | 13.28 ± 3.27 | 20.74 ± 4.40        | NA           | ND           |
| <i>D. stramonium</i>      | NA                  | ND           | ND           | NA                | ND            | ND           | NA                  | ND           | ND           |
| <i>N. glauca</i>          | NA                  | ND           | ND           | NA                | ND            | ND           | NA                  | ND           | ND           |
| <i>S. origanifolia</i>    | NA                  | ND           | ND           | NA                | ND            | ND           | NA                  | ND           | ND           |
| <i>W. aristata</i>        | 22.99 ± 7.97        | NA           | ND           | 72.22 ± 9.44      | 52.57 ± 4.96  | 27.79 ± 7.69 | 25.39 ± 3.92        | 13.16 ± 2.09 | ND           |
| Methylparaben             | 100.00 ± 0.00       | 85.11 ± 8.66 | 21.67 ± 5.70 | 100.00 ± 0.00     | 100.00 ± 0.00 | 34.13 ± 5.55 | 100.00 ± 0.00       | 82.78 ± 5.93 | 45.92 ± 9.64 |

Extracts with an inhibition growth higher than 20% at 1 mg/mL were assayed at lower concentrations (0.5 and 0.1 mg/mL). % Growth Inhibition: Means ± standard deviation (SD). NA : not active (% inhibition ≤10); ND : not determined; Methylparaben was used as a positive control.

**Table S2.** Antifungal effects (% growth inhibition) of selected plant fractions against *Alternaria alternata*, *Botrytis cinerea* and *Fusarium oxysporum*.

| Plant                    | Sample*      | <i>A. alternata</i> |              |              | <i>B. cinerea</i> |              |               | <i>F. oxysporum</i> |              |              |
|--------------------------|--------------|---------------------|--------------|--------------|-------------------|--------------|---------------|---------------------|--------------|--------------|
|                          |              | 1 mg/mL             | 0.5 mg/mL    | 0.1 mg/mL    | 1 mg/mL           | 0.5 mg/mL    | 0.1 mg/mL     | 1 mg/mL             | 0.5 mg/mL    | 0.1 mg/mL    |
| <i>A. thuscula</i>       | Extract EtOH | 23.63 ± 1.48        | 21.61 ± 5.32 | 13.34 ± 3.47 | 12.41 ± 0.55      | ND           | ND            | 41.21 ± 1.95        | 32.33 ± 4.10 | 19.29 ± 2.92 |
|                          | A-F1         | ND                  | ND           | ND           | ND                | ND           | ND            | 37.94 ± 5.50        | NA           | ND           |
|                          | A-F2         | ND                  | ND           | ND           | ND                | ND           | ND            | 18.68 ± 6.19        | ND           | ND           |
|                          | A-F3         | ND                  | ND           | ND           | ND                | ND           | ND            | NA                  | ND           | ND           |
| <i>C. symphytifolius</i> | Extract EtOH | 38.10 ± 10.85       | 18.96 ± 3.73 | ND           | 39.08 ± 3.70      | 37.98 ± 4.72 | 19.57 ± 3.32  | 35.27 ± 4.92        | NA           | ND           |
|                          | C-F1         | 51.32 ± 4.28        | 54.46 ± 3.04 | 45.72 ± 3.60 | 88.43 ± 5.34      | 85.80 ± 6.56 | 69.54 ± 5.37  | 44.24 ± 1.52        | 35.21 ± 2.15 | 27.44 ± 1.99 |
|                          | C-F2         | 54.95 ± 2.27        | 59.72 ± 3.54 | 36.67 ± 2.21 | 84.72 ± 3.66      | 80.54 ± 7.95 | 69.20 ± 11.46 | 42.01 ± 2.32        | 38.48 ± 2.46 | 26.59 ± 2.40 |
|                          | C-F3         | 11.76 ± 1.58        | ND           | ND           | 16.77 ± 4.35      | ND           | ND            | 36.84 ± 4.62        | 29.86 ± 2.63 | 11.62 ± 3.45 |
| <i>S. canariensis</i>    | Extract EtOH | 47.60 ± 0.70        | 44.61 ± 1.30 | 27.36 ± 2.54 | 62.16 ± 4.36      | 56.23 ± 3.90 | 35.13 ± 7.83  | 47.95 ± 1.82        | 44.76 ± 1.17 | 33.21 ± 1.93 |
|                          | S-F1         | 59.51 ± 1.92        | 58.31 ± 1.85 | 60.55 ± 1.88 | 86.27 ± 2.88      | 83.93 ± 4.57 | 69.14 ± 2.89  | 65.54 ± 2.20        | 69.94 ± 4.09 | 46.85 ± 2.07 |
|                          | S-F2         | 57.37 ± 2.29        | 52.71 ± 3.01 | 34.64 ± 1.35 | 78.10 ± 2.51      | 75.36 ± 5.34 | 58.54 ± 11.73 | 56.08 ± 1.76        | 49.92 ± 2.94 | 33.04 ± 4.76 |
|                          | S-F3         | NA                  | ND           | ND           | NA                | ND           | ND            | NA                  | ND           | ND           |
| <i>R. chalepensis</i>    | Extract EtOH | 17.08 ± 3.81        | ND           | ND           | NA                | ND           | ND            | 44.09 ± 1.63        | NA           | ND           |
|                          | R-F1         | ND                  | ND           | ND           | ND                | ND           | ND            | 78.11 ± 1.12        | 67.96 ± 2.38 | 12.29 ± 2.08 |
|                          | R-F2         | ND                  | ND           | ND           | ND                | ND           | ND            | 36.44 ± 1.72        | 30.05 ± 3.33 | 13.49 ± 1.61 |
|                          | R-F3         | ND                  | ND           | ND           | ND                | ND           | ND            | NA                  | ND           | ND           |
| <i>D. innoxia</i>        | Extract EtOH | 37.95 ± 2.40        | 35.14 ± 4.34 | 25.75 ± 4.40 | 52.11 ± 5.22      | 30.48 ± 5.19 | 13.28 ± 3.27  | 20.74 ± 4.40        | NA           | ND           |
|                          | D-F1         | NA                  | ND           | ND           | 13.85 ± 2.43      | ND           | ND            | ND                  | ND           | ND           |
|                          | D-F2         | 23.01 ± 4.58        | 12.74 ± 3.63 | ND           | 50.28 ± 8.84      | 32.36 ± 7.90 | 23.45 ± 5.49  | ND                  | ND           | ND           |
|                          | D-F3         | 39.36 ± 6.39        | 15.38 ± 3.84 | ND           | 68.49 ± 7.94      | 60.99 ± 8.30 | 27.86 ± 8.37  | ND                  | ND           | ND           |
| <i>W. aristata</i>       | Extract EtOH | 22.99 ± 7.97        | NA           | ND           | 72.22 ± 9.44      | 52.57 ± 4.96 | 27.79 ± 7.69  | 25.39 ± 3.92        | 13.16 ± 2.09 | ND           |
|                          | W-F1         | ND                  | ND           | ND           | 25.56 ± 7.00      | NA           | ND            | ND                  | ND           | ND           |
|                          | W-F2         | ND                  | ND           | ND           | 51.72 ± 5.06      | NA           | ND            | ND                  | ND           | ND           |
|                          | W-F3         | ND                  | ND           | ND           | 84.30 ± 4.77      | NA           | ND            | ND                  | ND           | ND           |

F1: hexanes fraction; F2: ethyl acetate fraction; F3: water fraction. % Growth Inhibition: Means ± standard deviation (SD).

NA: not active (% inhibition ≤10); ND: not determined; Methylparaben was used as a positive control.

(A)

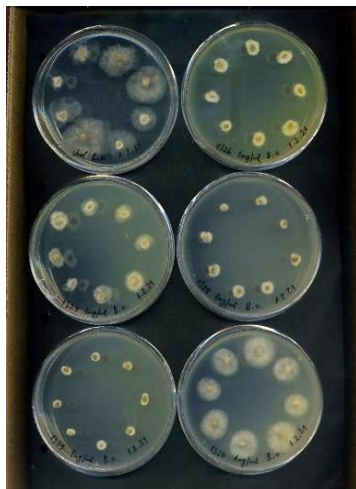

(B)

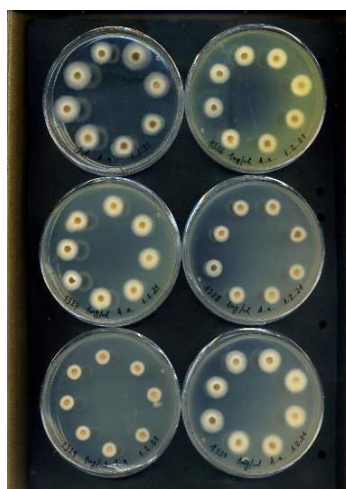

(C)

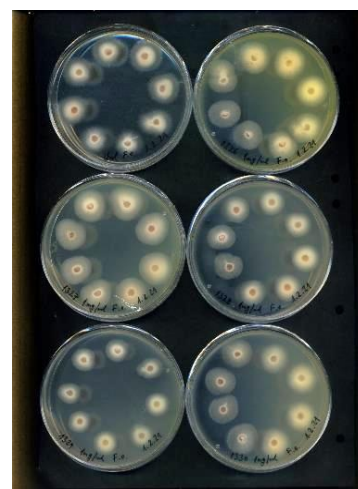

**Figure S1.** *In vitro* test-assay of plant extracts against *Alternaria alternata* (A), *Botrytis cinerea* (B) and *Fusarium oxysporum* (C).
